# Supplementary material for: How well can inverse analyses of high-resolution satellite data resolve heterogeneous methane fluxes? Observing system simulation experiments with the GEOS-Chem adjoint model (v35)
Source: Copernicus journal article supplement (doi:10.5194/gmd-14-7775-2021), 2021-12-23
Supplement: Supplementary file 1 [file gmd-14-7775-2021-supplement.pdf]

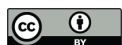

## *Supplement of*

# **How well can inverse analyses of high-resolution satellite data resolve heterogeneous methane fluxes? Observing system simulation experiments with the GEOS-Chem adjoint model (v35)**

**Xueying Yu et al.**

*Correspondence to:* Dylan B. Millet ([dbm@umn.edu](mailto:dbm@umn.edu))

The copyright of individual parts of the supplement might differ from the article licence.

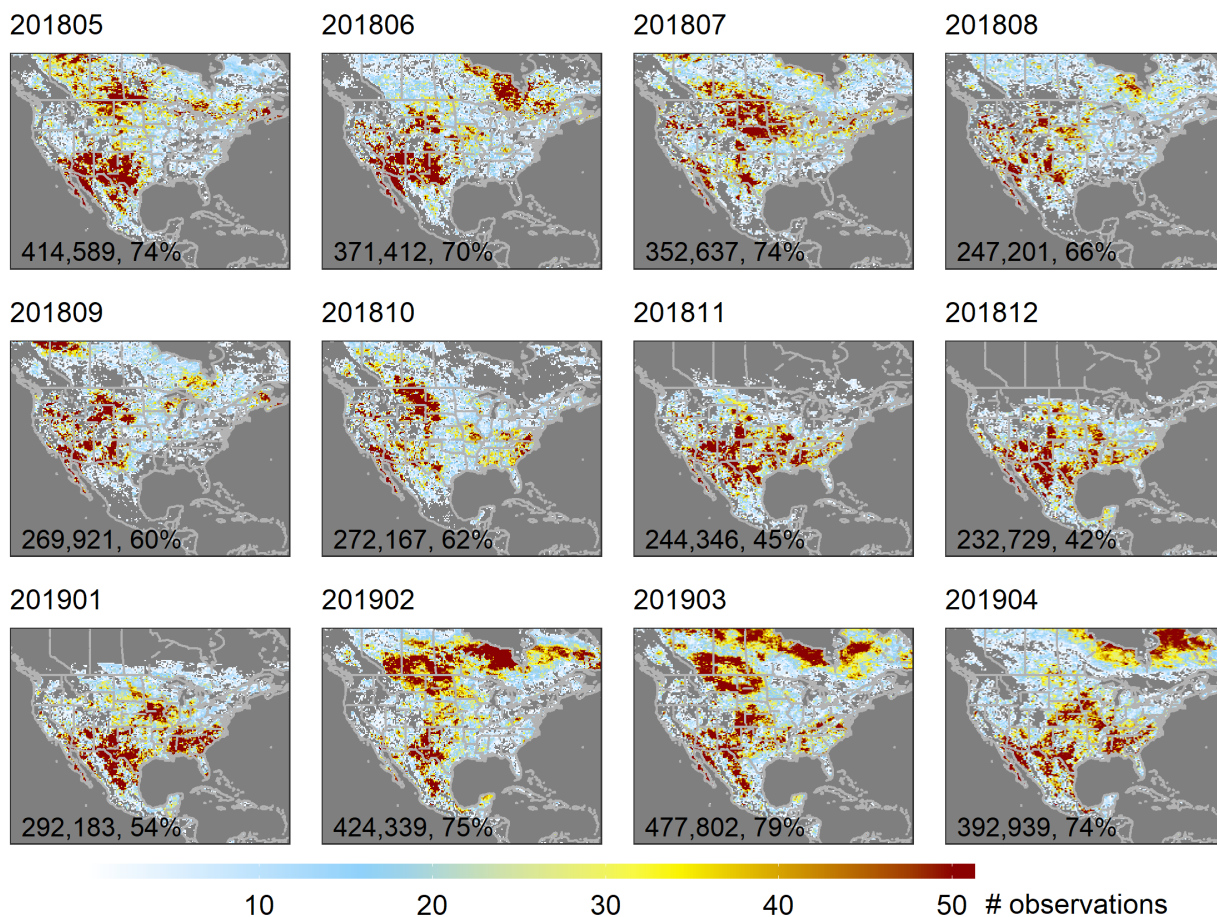

**Figure S1.** Monthly TROPOMI sampling density at  $0.25^\circ \times 0.3125^\circ$  resolution ( $\sim 25$  km) between May 2018 and April 2019, after filtering for data quality and clouds. The total number of observations, and percent over-land grid cell data coverage, is indicated in each panel.

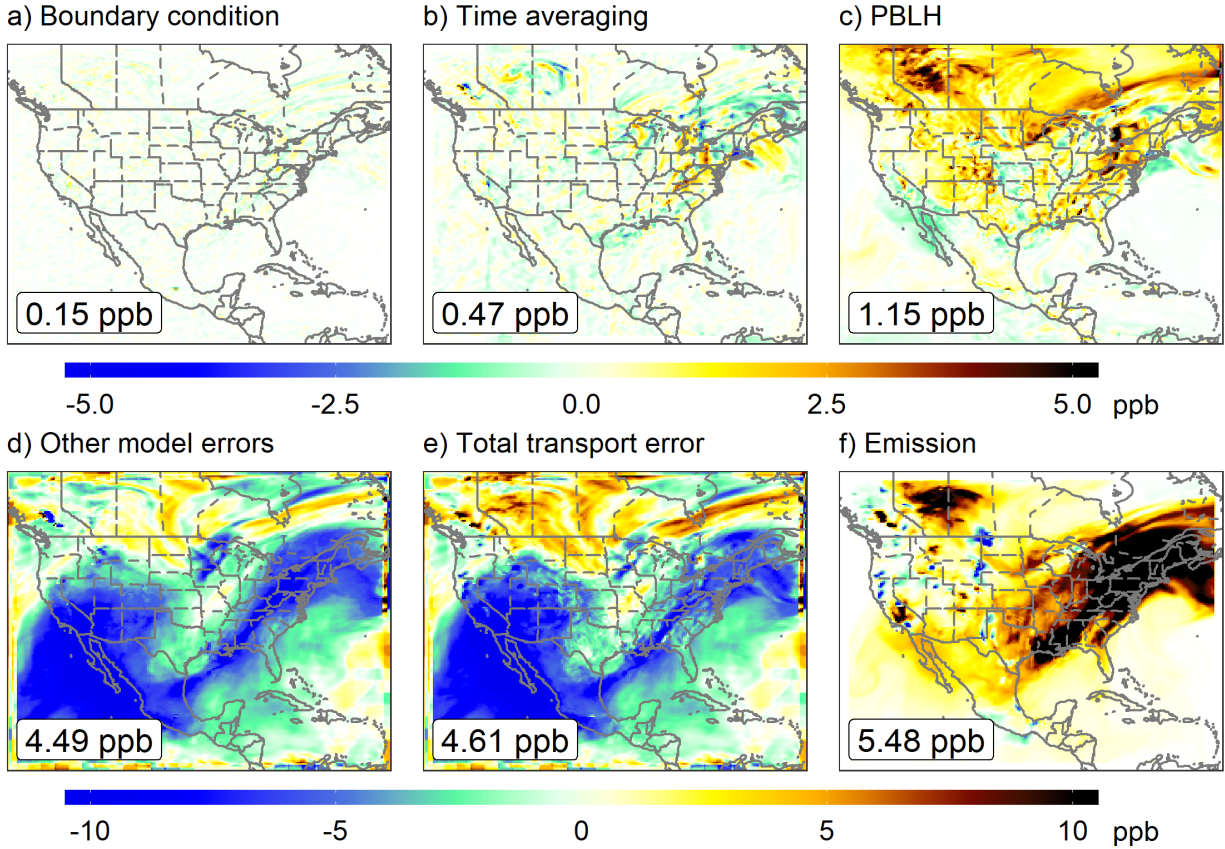

**Figure S2.** Methane column concentration differences for 2018-08-01 resulting from the individual model transport errors employed in the OSSE (see Sect. 2 for details). Shown are differences incurred from: a) using 6 versus 3 buffer grid cells at the domain boundary; b) averaging over 13:00-14:00 LT versus sampling the model instantaneously at the satellite overpass time; c) employing non-local versus full PBL mixing schemes; d) alternate convection and tropopause treatments; and e) all model transport errors. Shown for comparison are f) the column differences that arise from employing the true versus spatially biased prior emissions. The root-mean-square errors (RMSE) relative to the true fluxes are labeled in each panel.

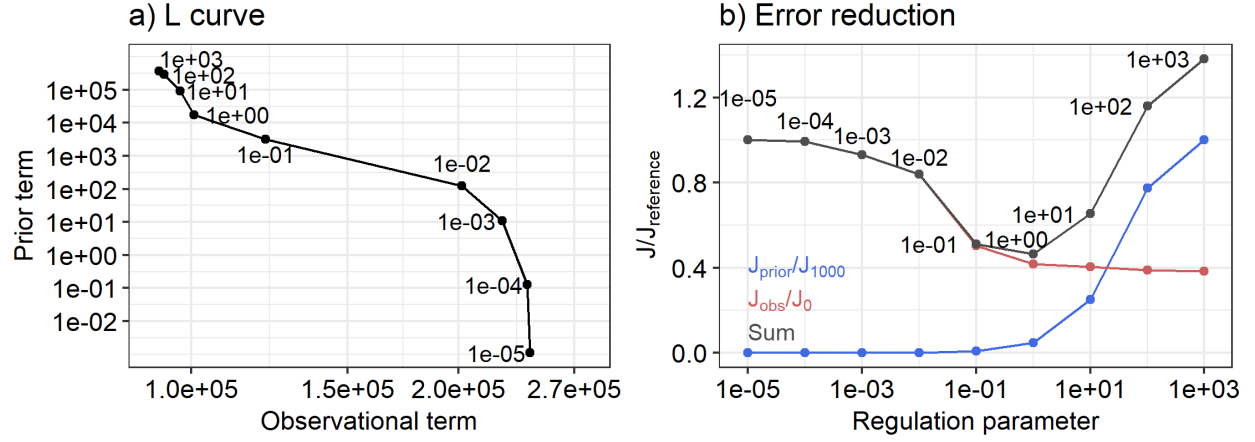

**Figure S3.** Cost function analysis and determination of the regularization parameter  $\gamma$  based on one-week inversions with spatially uniform prior errors. Panel a) shows the L curve comparing the prior and observational deviation terms in the cost function as a function of  $\gamma$ , following the method in Hansen and O’Leary (1993). As shown in Eq. 1 of the main text, the prior term is given by  $(x - x_a)^T S_a^{-1} (x - x_a)$  and the observational term is given by  $(y - F(x))^T S_{\text{obs}}^{-1} (y - F(x))$ . Panel b) shows the prior term divided by the total cost function computed at  $\gamma = 1000$  ( $J_{1000}$ , where the solution is mostly determined by the observations; blue line), the observational term divided by the total cost function computed at  $\gamma = 0$  ( $J_0$ , where the solution is solely determined by the prior; red line), and the sum of the blue and red lines (in grey).

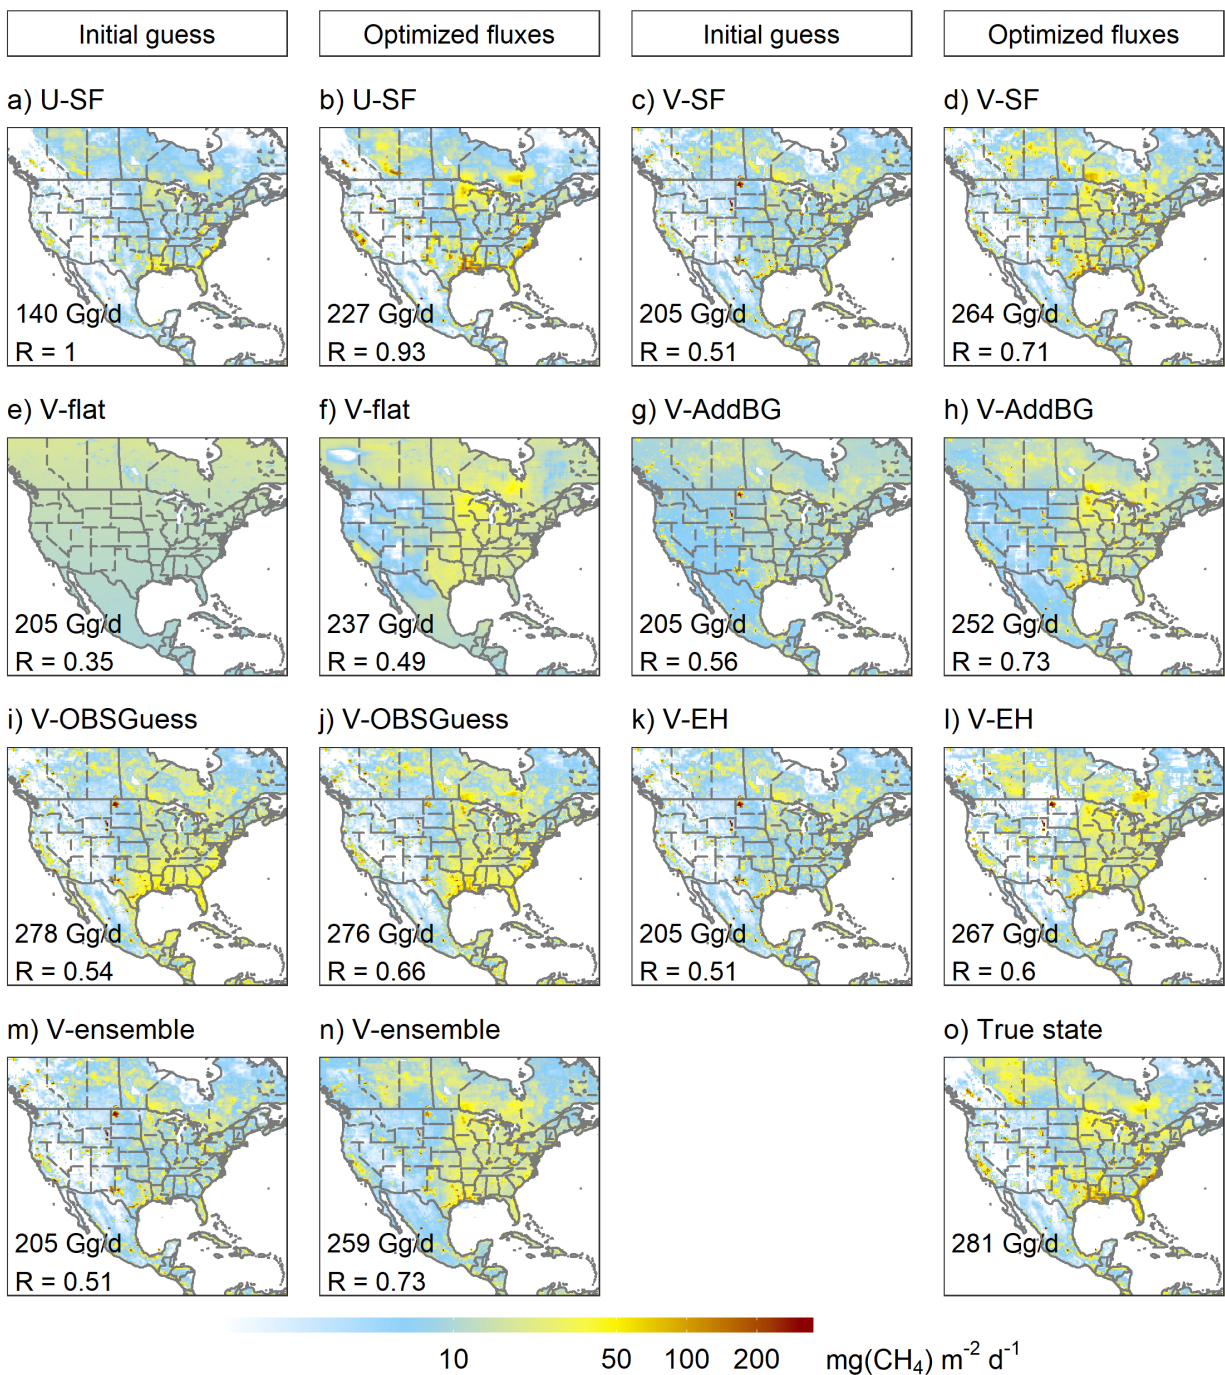

**Figure S4.** Initial guess and optimized emissions for each inversion framework. Labels inset indicate the domain-wide total emissions and spatial correlation to the true fluxes.



### Emission increments

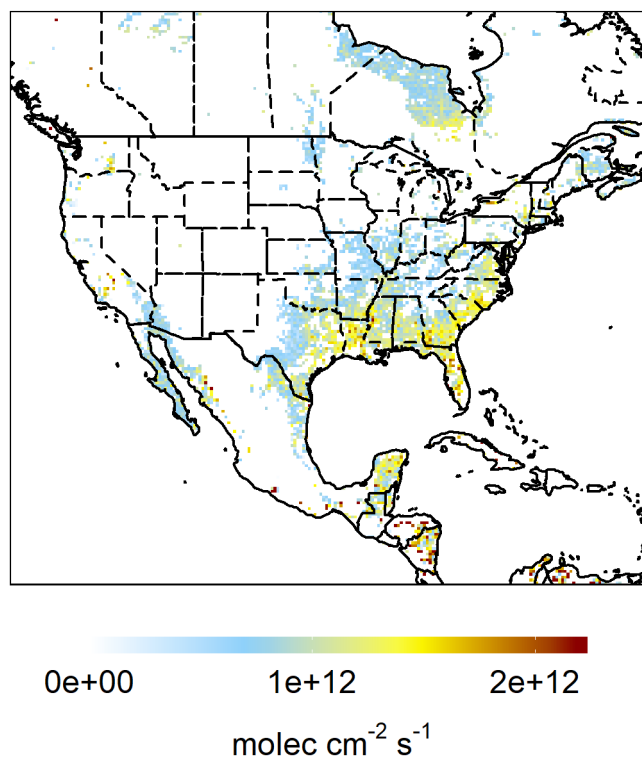

**Figure S5.** Emission increments added to the prior fluxes in the V-OBSGuess inversions. See Sect. 4 for details.

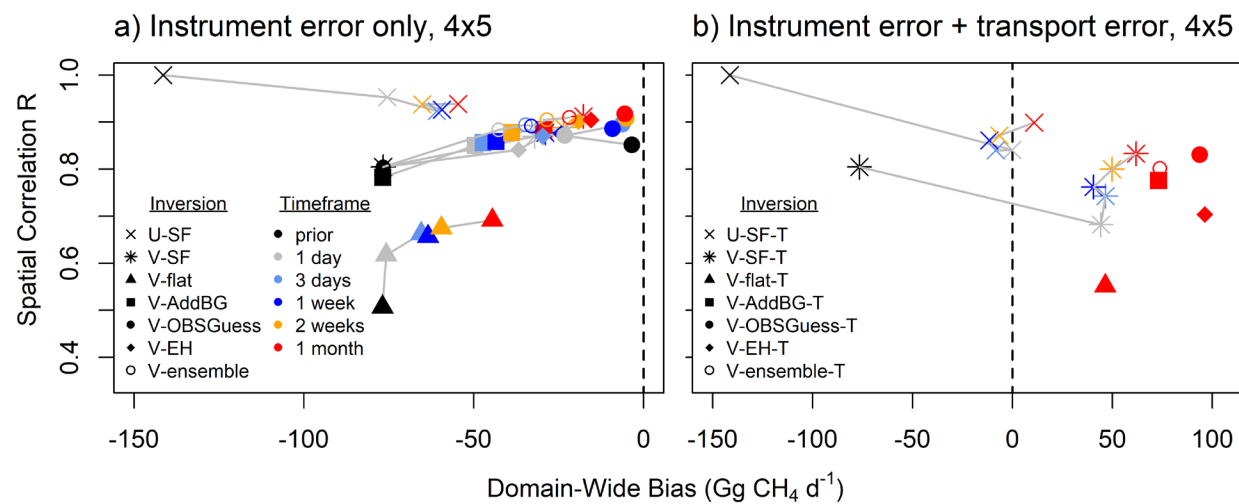

**Figure S6.** Same as Figure 8, but with prior and posterior results degraded to  $4^{\circ} \times 5^{\circ}$  horizontal resolution.

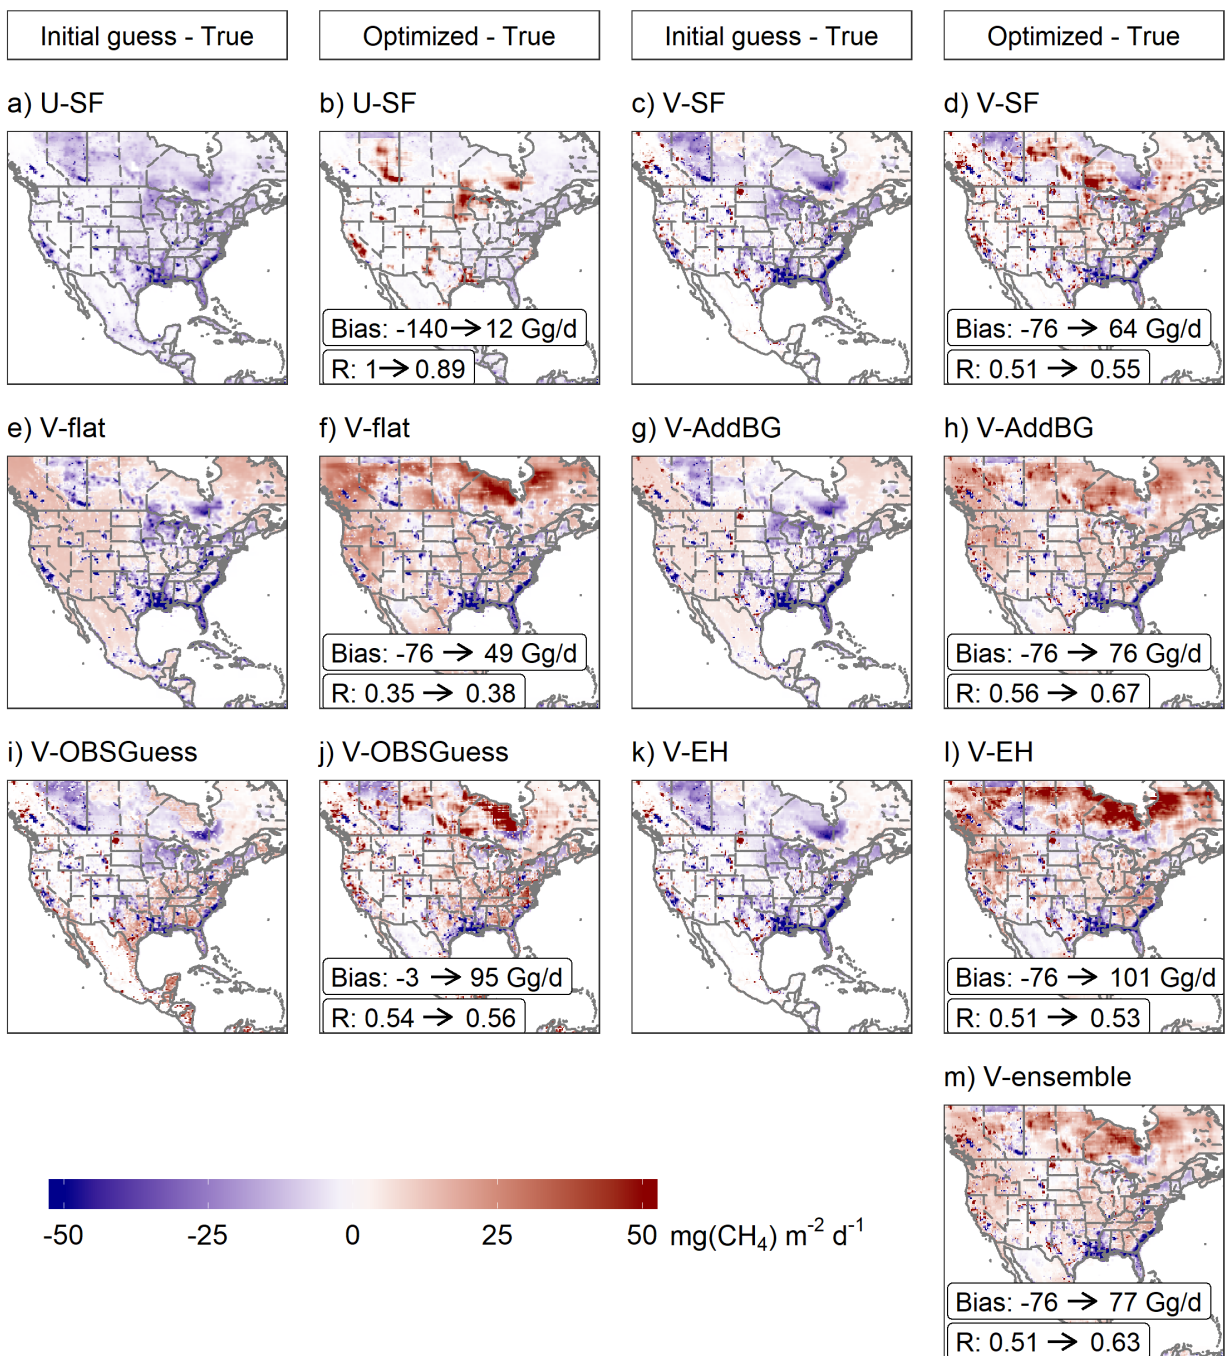

**Figure S7.** Same as Fig. 4, but showing results with model transport error.



**Table S1. Filters applied for TROPOMI data quality assurance**

| <b>Parameter</b>                                                 | <b>Range</b>                   |
|------------------------------------------------------------------|--------------------------------|
| Solar Zenith Angle (SZA)                                         | $\leq 70^\circ$                |
| Viewing Zenith Angle (VZA)                                       | $\leq 60^\circ$                |
| Surface albedo                                                   | $\geq 0.02$                    |
| Aerosol Optical Thickness (AOT)                                  | $< 0.3$                        |
| XCH <sub>4</sub> precision (noise-related error)                 | $< 10$ ppb                     |
| Signal-to-noise ratio                                            | $\geq 50$                      |
| $\chi^2$                                                         | $< 100$                        |
| Fraction of non-corrupted/unphysical spectral pixel <sup>1</sup> | $\geq 70\%$                    |
| Cloudiness level                                                 | Confidently clear <sup>1</sup> |

<sup>1</sup>Pixel quality is determined per orbit, for details see the TROPOMI Product User Manual (2019).

## Reference

Hansen, P. C., and O’Leary, D. P.: The Use of the L-Curve in the Regularization of Discrete Ill-Posed Problems, SIAM Journal on Scientific Computing, 14(6), 1487-1503, 10.1137/0914086, 1993.

TROPOMI product user manual: <http://www.tropomi.eu/data-products/methane/>, last access: 15 April 2019.
